# Supplementary material
Source: PubMed Central journal article supplement (PMC8233960)
Supplement: mmc1.pdf [file mmc1.pdf]

**Cancer Cell, Volume 39**

**Supplemental information**

**Immunogenicity of a heterologous COVID-19 vaccine  
after failed vaccination in a lymphoma patient**

**Joshua A. Hill, Chaitra S. Ujjani, Alexander L. Greninger, Mazyar Shadman, and Ajay K. Gopal**

Supplemental information

| <b>Table S1.</b> Immunologic markers and SARS-CoV-2 antibody response in a 59-year-old man with lymphoplasmacytic lymphoma receiving a Bruton's tyrosine kinase inhibitors (BTKi) |                                         |                                         |                       |                                                       |
|-----------------------------------------------------------------------------------------------------------------------------------------------------------------------------------|-----------------------------------------|-----------------------------------------|-----------------------|-------------------------------------------------------|
|                                                                                                                                                                                   | <b>Pre-vaccine 1</b><br>(BNT162b2 mRNA) | <b>Pre-vaccine 2</b><br>(BNT162b2 mRNA) | <b>Post-vaccine 2</b> | <b>Post-vaccine 3</b><br>(JNJ-78436735, viral vector) |
| <b>Anti-SARS-CoV-2 spike protein total antibody titer (AU/mL)<sup>a</sup></b>                                                                                                     | NA                                      | NA                                      | <0.4                  | 215                                                   |
| <b>Anti-SARS-CoV-2 neutralizing antibody titer (ND<sub>50</sub>)<sup>a</sup></b>                                                                                                  | NA                                      | NA                                      | NA                    | 242                                                   |
| <b>WBC (10<sup>3</sup> cells/uL)<sup>b</sup></b>                                                                                                                                  | 3.68                                    | 3.51                                    |                       | 4.48                                                  |
| <b>ALC (10<sup>3</sup> cells/uL)<sup>b</sup></b>                                                                                                                                  | 1.55                                    | 1.41                                    |                       | 1.89                                                  |
| <b>IgG (mg/dL)<sup>c</sup></b>                                                                                                                                                    | 587                                     | NA                                      |                       | 585                                                   |
| <b>IgM (mg/dL)<sup>c</sup></b>                                                                                                                                                    | 180                                     | NA                                      |                       | 189                                                   |
| <b>IgA (mg/dL)<sup>c</sup></b>                                                                                                                                                    | 94                                      | NA                                      |                       | 101                                                   |
| <b>CD3+/CD4+ T cells (cells/uL)<sup>d</sup></b>                                                                                                                                   | NA                                      | NA                                      |                       | 1,039                                                 |
| <b>CD3+/CD8+ T cells (cells/uL)<sup>d</sup></b>                                                                                                                                   | NA                                      | NA                                      |                       | 489                                                   |
| <b>CD19+ B cells (cells/uL)<sup>d</sup></b>                                                                                                                                       | NA                                      | NA                                      |                       | 2                                                     |

WBC, white blood cell count; ALC, absolute lymphocyte count; NA, not available.  
<sup>a</sup>Testing was performed 35 days after vaccine 2 and 18 days after vaccine 3. The ND<sub>50</sub> corresponds to the dilution of serum (1:242 in this case) resulting in 50% neutralization using a D614G SARS-CoV-2 spike protein pseudotyped lentivirus neutralization assay (Crawford et al., 2020). This is equivalent to an ND<sub>50</sub> of 51 IU/mL based on a conversion factor for the WHO international units.  
<sup>b</sup>WBC and ALC were collected 34 days prior to vaccine 1, 1 day prior to vaccine 2, and 12 days after vaccine 3. The lower limit of normal for WBC and ALC is 4.3 x 10<sup>3</sup> and 1.0 x 10<sup>3</sup> cells/uL, respectively.  
<sup>c</sup>Total immunoglobulins were collected 58 days prior to vaccine 1 and 12 days after vaccine 3. The lower limits of normal for IgG, IgM, and IgA are 610, 40, and 84 mg/dL, respectively.  
<sup>d</sup>Flow cytometry analyses were performed on a whole blood sample obtained 21 days after vaccine 3. The lower limits of normal for CD4+ T cells, CD8+ T cells, and B cells are 730, 250, and 160 cells/uL, respectively.
